# Supplementary material for: Lower hand grip strength in older adults with non-alcoholic fatty liver disease: a nationwide population-based study
Source: PubMed Central journal article supplement (PMC6660042; doi:10.18632/aging.102068), 2019-07-07
Supplement: aging-11-102068-s002.pdf [file aging-11-102068-s002.pdf]

## SUPPLEMENTARY TABLE

**Supplementary Table 1. Independent association between hepatic steatosis index and hand grip strength after additional adjustment for fasting HOMR-IR and serum hsCRP in the multivariable model.**

| Independent variables   | Dependent variable: hand grip strength |              |                  |
|-------------------------|----------------------------------------|--------------|------------------|
|                         | $\beta$                                | SE           | <i>P</i>         |
| <b>Men</b>              |                                        |              |                  |
| Age                     | <b>-0.322</b>                          | <b>0.024</b> | <b>&lt;0.001</b> |
| Weight                  | <b>0.300</b>                           | <b>0.042</b> | <b>&lt;0.001</b> |
| Systolic BP             | 0.005                                  | 0.015        | 0.723            |
| Smoking habit           | 0.165                                  | 0.335        | 0.622            |
| Resistance exercise     | 0.127                                  | 0.282        | 0.651            |
| Serum total cholesterol | <b>0.014</b>                           | <b>0.007</b> | <b>0.035</b>     |
| Serum triglycerides     | -0.001                                 | 0.002        | 0.447            |
| HbA1c                   | -0.331                                 | 0.299        | 0.270            |
| Serum ALT               | 0.020                                  | 0.018        | 0.252            |
| Serum hsCRP             | -0.150                                 | 0.077        | 0.053            |
| Fasting HOMA-IR         | -0.104                                 | 0.101        | 0.303            |
| Hepatic steatosis index | <b>-0.254</b>                          | <b>0.096</b> | <b>0.009</b>     |
| <b>Women</b>            |                                        |              |                  |
| Age                     | <b>-0.209</b>                          | <b>0.021</b> | <b>&lt;0.001</b> |
| Weight                  | <b>0.226</b>                           | <b>0.029</b> | <b>&lt;0.001</b> |
| Systolic BP             | 0.006                                  | 0.009        | 0.539            |
| Smoking habit           | -0.608                                 | 0.364        | 0.097            |
| Resistance exercise     | 0.433                                  | 0.227        | 0.058            |
| Serum total cholesterol | -0.004                                 | 0.004        | 0.333            |
| Serum triglycerides     | 0.001                                  | 0.002        | 0.745            |
| HbA1c                   | 0.014                                  | 0.192        | 0.944            |
| Serum ALT               | <b>0.034</b>                           | <b>0.014</b> | <b>0.013</b>     |
| Serum hsCRP             | -0.072                                 | 0.080        | 0.370            |
| Fasting HOMA-IR         | <b>-0.094</b>                          | <b>0.040</b> | <b>0.021</b>     |
| Hepatic steatosis index | <b>-0.304</b>                          | <b>0.067</b> | <b>&lt;0.001</b> |

The Enter method was applied to this model, with hand grip strength as a dependent variable, and with age, weight, systolic blood pressure, smoking habit, resistance exercise, total cholesterol, triglycerides, HbA1c, ALT, hsCRP, HOMA-IR, and hepatic steatosis index as independent variables, simultaneously. Values were adjusted for all the other variables in the table. **Bold** numbers indicate statistically significant values.  $\beta$ , regression coefficient; SE, standard error; BP, blood pressure; HbA1c, glycated hemoglobin A1c; ALT, alanine aminotransferase; hsCRP, high-sensitivity C-reactive protein; HOMA-IR, homeostasis model assessment-estimated insulin resistance.
