# Supplementary material for: Lower hand grip strength in older adults with non-alcoholic fatty liver disease: a nationwide population-based study
Source: publisher site journal article supplement (doi:10.18632/aging.102068), 2019-07-07
Supplement: Supplementary file [file aging-v11i13-102068-supplementary-material-SD1.pdf]

SUPPLEMENTARY FIGURE

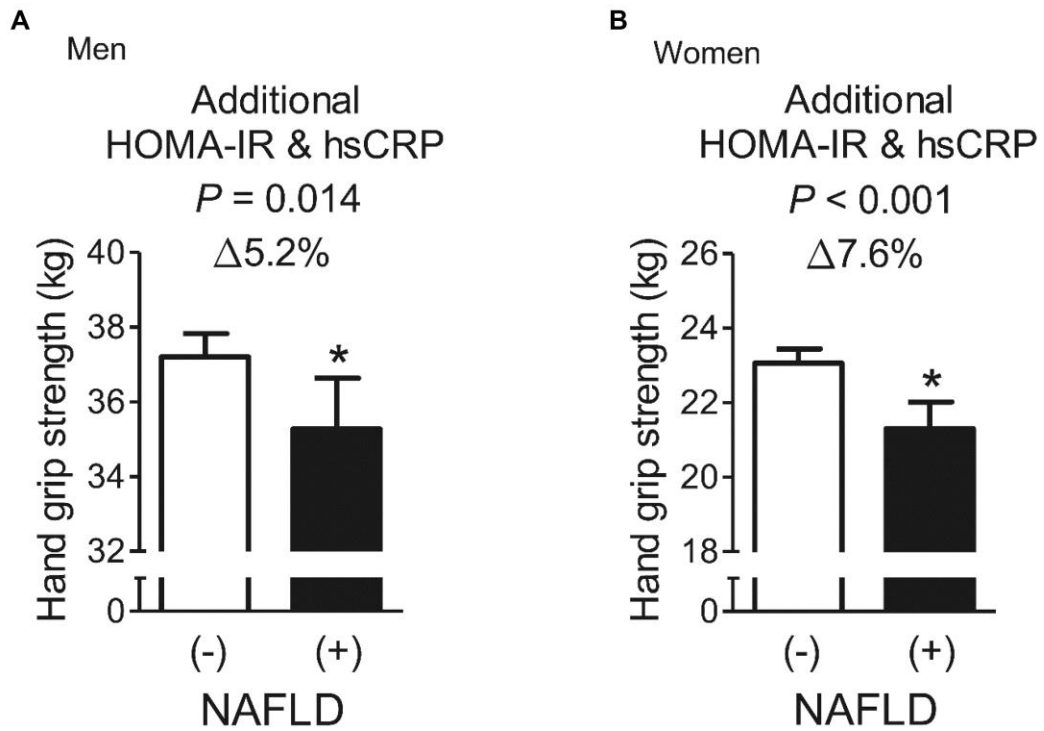

**Supplementary Figure 1. Difference in hand grip strength between subjects with and without NAFLD after additional adjustment for fasting HOMA-IR and serum hsCRP in the multivariable model. (A) Men and (B) women. Values are presented as the estimated mean and 95% confidence interval, after adjustment for confounding factors. Delta ( $\Delta$ ) indicates a difference in hand grip strength from the control group. \*Statistically significant difference from the control group. Multivariable model: adjustment for age, weight, systolic blood pressure, smoking habit, resistance exercise, total cholesterol, triglycerides, glycated hemoglobin A1c, and alanine aminotransferase. NAFLD, non-alcoholic fatty liver disease; HOMA-IR, homeostasis model assessment-estimated insulin resistance; hsCRP, high-sensitivity C-reactive protein.**
